# Supplementary material
Source: Springer Nature journal article supplement (https://www.springermedizin.de/resource/supplementary/12911_2012_558_MOESM4_ESM.pdf/9525826)

A

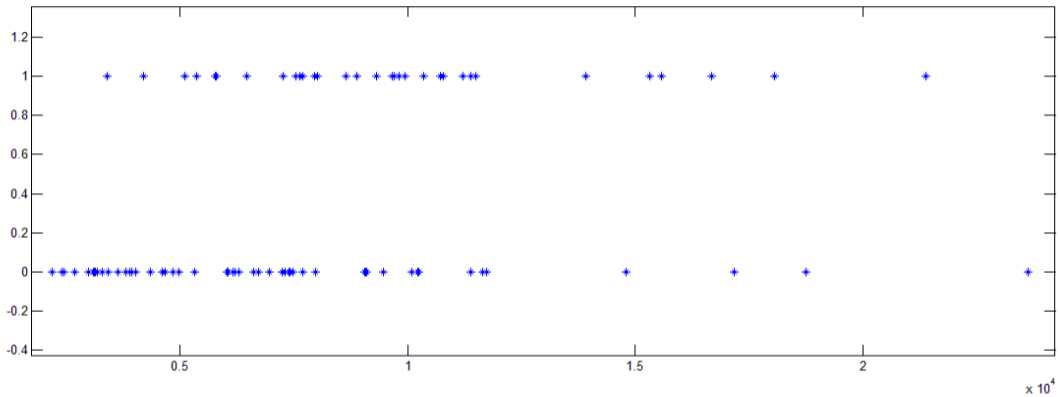**AMSA**

Successful shocks

Unsuccessful shocks

**Mean  $\pm$  Standard Deviation**10.2  $\pm$  5.316.65  $\pm$  4.36

Supplement: MOESM4 [file 9525826]
